# **A gyroscopic advantage: phylogenetic patterns of compensatory movements in frogs**

Petra Frýdlová<sup>1,2</sup>, Kristýna Sedláčková<sup>1,2</sup>, Barbora Žampachová<sup>1,2</sup>, Anikó Kurali<sup>1</sup>, Jan Hýbl<sup>3</sup>, David Škoda<sup>3</sup>, Patrik Kutílek<sup>3\*</sup>, Eva Landová<sup>1,2\*†</sup>, Rudolf Černý<sup>4\*</sup>, Daniel Frynta<sup>1,2\*</sup>

<sup>1</sup> Department of Zoology, Faculty of Science, Charles University, Viničná 7, CZ-12843 Prague, Czech Republic

<sup>2</sup> National Institute of Mental Health, Topolová 748, CZ-25067, Klecany, Czech Republic

<sup>3</sup> Department of Natural Science, Faculty of Biomedical Engineering, Czech Technical University, Náměstí Sítná 3105, CZ-27201 Kladno, Czech Republic

<sup>4</sup> Department of Neurology, 2nd Faculty of Medicine, Charles University and University Hospital Motol, V Úvalu 84, CZ-15000 Prague, Czech Republic

\* Contribution of these authors is equal

† Corresponding author: Eva Landová, Department of Zoology, Faculty of Science, Charles University, Viničná 7, CZ-12844 Praha 2, Czech Republic. E-mail: [eva.landova@natur.cuni.cz](mailto:eva.landova@natur.cuni.cz), Phone: +420-221951846, +420-723409406

Key words: anura – ecomorphology – compensatory movement - locomotion

## **Summary statement**

This article provides the first comparative study of Anura exploring the head compensatory movements in an ecomorphological context. Our results revealed elevated compensatory abilities in Natatanura clade interpreted as a gyroscopic advantage.

## Abstract

Head and eye compensatory movements known as vestibulo-ocular and vestibulo-cervical reflexes are essential to stay orientated in space while moving. We have used a previously developed methodology focused on the detailed mathematical description of head compensatory movements in frogs without the need for any surgical procedures on the examined specimens. Our comparative study comprising 35 species of frogs from different phylogenetic background revealed species specific head compensatory abilities ensuring gaze stabilization. Moreover, we found a strong phylogenetical signal highlighting the great ability of compensatory head movements in families of Pyxicephalidae and Rhacophoridae from Natatanura group. On the other hand, families of Dendrobatidae and Microhylidae exhibited only poor or no head compensatory movements. Contrary to our expectation, the results did not corroborate an ecomorphological hypothesis anticipating a close relationship between ecological parameters and the head compensatory movements. We did not find any positive association between a more complex (3D structured, arboreal or aquatic) habitats as well as more saltatory behaviour and elevated abilities of head compensatory movements. Moreover, we found compensatory movements in most basal Archeobatrachia giving an indication of common ancestry of these abilities in frogs but variously pronounced in particular families. We hypothesize that the uncovered proper gaze stabilization during locomotion provided by the higher head compensatory abilities can improve or even enable visual perception of the prey. We interpret this completely novel finding as a possible gyroscopic advantage in a foraging context. We discuss putative consequences of such advanced neuromotor skills for diversification and ecological success of Natatanura group.

## Introduction

Terrestrial vertebrates have to manage the gaze stabilization during active or passive movement. The head and/or body movement is compensated by movements of the eyes and neck in order to prevent displacement of the retinal picture and visual degradation (Dieringer and Precht, 1982; Dieringer, 1995). The head compensatory movement is known to be the dominant way of gaze stabilization (80%) compared to a limited contribution of eyes (Dieringer and Meier, 1994). Head and eye movements act together to achieve proper gaze stabilization, and both use the sensorial inner ear organs and anatomical substrate at the level of the vestibular nuclei in the brainstem. Vestibulo-ocular reflex (VOR) stabilizes the eye position in the head, so the gaze direction remains stable during head or body movements. The main efferent pathway of this reflex is *fasciculus longitudinalis medialis* which connects the vestibular and oculomotor nuclei. Anatomy and physiology of this three-neuronal reflex is alike in fish, frogs and cats, as revealed by experiments of Dieringer (1991), pointing to this system's great universality. Vestibulo-collic reflex (VCR) adjusts the head position via the medial vestibulo-spinal tract (Goldberg and Cullen, 2011). Vestibulo-ocular and vestibulo-collic reflexes are complementary and driven at low frequency (<0.1 Hz) by stimulation of otoliths and at higher frequencies by stimulation of semi-circular canals, disappearing following a canal destruction (Takemura and King, 2005). Deficits in prey capture due to vestibulo-collic reflex dysfunction following a labyrinth lesion in *Rana pipiens* were described by King and Straka (1998). For a detailed description of anatomical networks connecting vestibular sensors with oculomotor (VOR) and neck muscles neurons (VCR), see review by Uchino and Kushiro (2011). Gain of VCR is variable depending on a behavioural context and decreases with a predictable stimulation (Reynolds and Gdowski, 2008).

Increasing complexity of surroundings requires an improvement in performance of both vestibulo-ocular and vestibulo-collic reflexes. Locomotor performance is linked to animal fitness such as foraging efficiency and escape from predators (Dickinson et al., 2000) and is expected to be under

a strong selection. Hence, Dieringer (1991) suggested that locomotion is: “an important evolutionary driving force for the adaptation of the performance of these reflexes.” We consider this idea as an ideal model for studies dealing with the ecomorphology of anurans.

The bodily plan of frogs with their short tailless bodies, broad neckless heads, and long muscular hindlimbs is unique in tetrapods (Zug et al., 2001). The prevailing uniformity and morphological specializations are associated with, and likely evolved as, an adaptation for saltatory locomotion (Havelková et al., 2007; Přikryl et al., 2009; Jenkins and Shubin, 1998; Reilly and Jorgensen, 2011; but see Herrel et al., 2016). Despite this morphological specialization, numerous studies on anuran morphology, ecology, and performance have corroborated the relationship between the habitat type, locomotion mode, and morphology (Zug et al., 1978; Reilly and Jorgensen, 2011; Moen et al., 2013; Robovská-Havelková et al., 2014; Reilly et al., 2015, 2016; Manzano et al., 2017). Such relationships are associated with ecological morphology (ecomorphology) which is a comparative discipline focused on the interaction of morphological and ecological diversity among organisms both in the present and over evolutionary time (Motta and Kotschal, 1992). Some aspects of the interindividual morphological variation may lead to functional and performance differences that result in differences in how these individuals use available resources. According to these assumptions it can be causally linked to fitness (Garland and Losos, 1994). As ecomorphology becomes a framework for addressing adaptation, phylogenetical relationships among examined species should be considered (Harvey and Pagel, 1991). The whole discipline increased the conceptual advances after the incorporation of explicit phylogenetic hypotheses resolving the statistical dilemma of the nonindependence of characters for those taxa which share a trait due to common ancestry (Felsenstein, 1985; Losos and Miles, 1994; Revell, 2012).

Following the ecomorphological methodology comprising the morphological, functional, performance, and comparative approach (Miles, 1994; Garland, 1994; Motta and Kotschal, 1992;

Birn-Jeffery and Higham, 2014), we presume that in frogs, ecology and compensatory head movements are strongly related. The head compensatory movements were under the various selective pressure in different habitats. Evolutionary history of such selection can be reconstructed from the current distribution of ecological, morphological, and behavioural traits (Garamszegi, 2014; Herron and Freeman, 2014). We assume a positive association between a more complex (3D) habitats as well as more saltatory behaviour and head compensatory movement. 3D habitats are those that force the animal to be oriented in all three-dimensional spatial axes due to the complex structure of vegetation. Comparing to plain habitats where only two directions of movements are essential (terrestrial habitats, like muds, semideserts, etc.), these more heterogenous and fine-grained 3D habitats possess more continuous variation between all three dimensions of habitats. In Anurans, arboreal and semi-aquatic species inhabits such types of 3D complex habitats.

We tested the following questions: (1) Are there differences in compensatory head movements among frog species? (2) Is there any relationship between the habitat type and the ability and degree of compensatory head movements? (3) Is there any association between the locomotion type and ability and degree of compensatory head movements? (4) Are there privileged clades of frogs possessing advanced compensatory abilities as a result of their evolutionary history regardless of their current ecology? Finally, we discuss putative consequences of such compensatory mechanisms for diversification and ecological success of certain frog taxa.

## **Material and Methods**

### **Specimens**

We tested 35 species (113 adult individuals) of 12 families from phylogenetically different clades to cover the whole diversity of Anura. Frogs were housed individually in a temperature-controlled room and fed by crickets and earthworms supplemented with vitamins and minerals (Nutri Mix, Trouw Nutrition Biofactory, Ltd.) twice weekly. Animals were weighted by a digital balance to the nearest

0.01 g and measured by digital callipers to the nearest 0.01 mm. For each individual, we measured the snout–vent length (SVL) and the tibiofibular length. We calculated the body mass index (BMI) as a ratio of body mass to SVL with the scaling exponent set to 3 (Green, 2001). BMI is representing a parameter of body robustness/gracility. The length of tibiofibula was related to SVL as a relative tibiofibula (rTF). As the length of hind-limbs is usually positively associated with jumping performance, rTF can be considered as an ideal proxy of jumping ability (Emerson, 1988; Rand, 1952; Zug, 1972, 1978; but see Jorgensen and Reilly, 2013). Experiments were performed in accordance with Czech law implementing all corresponding European Union regulations. This experiment was focused only on the natural behaviour with no application of anaesthesia, surgical procedures, and immobilization.

### **Design of experimental testing**

Compensatory head movements were measured on a dynamic platform prototype (Fig. 1A, B) constructed at the Faculty of Biomedical Engineering, Czech Technical University (Hýbl et al., 2016; Kutílek et al., 2015, 2017). A cyclic platform movement has been used in studies measuring the vertebrate body movements, i.e. the body segment movement (Dieringer, 1987, 1991; Tempia et al., 1991). We focused on the application of methods for the assessment of periodical movement of body segments in the sagittal plane. Movement of the platform is based on the control of angular velocity. The angular velocity was set to 5°/s, the amplitude was 21.6° (the whole range of the platform movement was 43.6°). This gives frequency 0.12, stimulating mainly saccular otolithic macula in the vertical plane (Uchino and Kushiro, 2011). Individual periods of motion are indicated by a sequence number (1-10). One period of the platform movement is composed of two parts - descending and ascending corresponding to the head extension and head flexion (Fig. 2). The platform was fixed in the centre and moved periodically with one end up and the second down and vice versa (the principle of double-acting lever). One experiment lasted 174.4 s and contained 10 periods. For each animal we

recorded one trial. Nevertheless, it was not usually possible to record all the ten periods (Mean = 5.94; Range = 1-9) due to the motion of the whole frog's body (walking, hopping, burrowing) during the experiment. For the analysis, we used all available periods.

We put two markers (non-toxic colour) on the temporal side of the head (between eye and ear; Fig. 1C) for measurement of compensation head movements in the sagittal plane in relation to the platform. The body of the frog was unrestrained (in a plastic box, Fig. 1A) and placed on the platform in a way that the longitudinal axis corresponded to the longitudinal axis of the platform (Kutřlek et al., 2015). The digital camera was a subsystem of the dynamic platform device. It was recording (with the frequency of 30-60 frames per second according to the light conditions) the experimental animals in the box while moving synchronically together with the platform. The digital camera was focused on the head markers. We tracked markers on the head after processing from the video recording. Marker coordinates were detected on pictures automatically based on the contrast between their colour and the skin colour. The records contained the timestamps, which incorporated the information, when each frame was recorded. It allowed us to synchronize the head movement with that of the platform (for a detailed description see Kutřlek et al. 2015, 2017). We analysed only those parts of recording where the markers on the temporal side of the head were perpendicular to the digital camera, the frog was sitting motionlessly and did not lean against the wall of the plastic box. The line of the two markers (expressing the head movements) was related to the movements of the platform and the compensatory head movements were evaluated (Fig. 1D).

Data record should be normalized, to make the data comparable across the groups of subjects and different species of animals (Stansfield et al., 2006). The normalization of measured variables (i.e., record is normalized for movement amplitude) is derived from medical applications (Stansfield et al., 2006). Let  $\Delta_i$  is tilt angle of movement of a body segment,  $\Omega_i$  is tilt angle of the platform and  $\Omega_{\min}=\Omega_{\max}$  are tilt angles of the platform when the platform reaches the extreme



angles. The range of movement (ROM) of the platform is  $ROM_P=2\cdot\Omega_{max}$ . Then the normalized values of the tilt angle of movement of a body segment and the tilt angle of the platform are:

$$\Delta_i[pct] = 100 \times \frac{\Delta_i[deg]}{ROM[deg]} \quad (1)$$

$$\Omega_i[pct] = 100 \times \frac{\Omega_i[deg]}{ROM_P[deg]} \quad (2)$$

In accordance with preliminary research, periodical movements of platform were used (Kutílek et al., 2015; Hýbl et al., 2016). The one period of platform movement is composed of two parts - descending and ascending corresponding to the head extension and head flexion. Each period was divided into two halves of period - head extension and head flexion, and each half of period was divided into three unequal parts - I., II., III. The I. and III. part covers a quarter of the duration (i.e., only initial and final parts of the platform movement) of a half of period when the platform performs non-uniform circular motion. The II. part covers half of the duration (middle part) of a half of period when it is a uniform motion at a constant angular velocity.

To evaluate the head angular movement, we have proposed following quantitative parameters (Table 1, Fig. 2). The Range of Movement (ROM) describes the flexibility of head movements during the platform movement head extension ( $ROM_E$  - a range of the head movement during extension) and flexion ( $ROM_F$  - a range of the head movement during flexion). Parameter ROM representing head compensatory movements describes the neck mobility as a response and correlative to the movements of the platform (for the calculation of ROMs in percent see equations 3 and 4).

$$ROM_E = 100 \times \frac{\Delta_{1max}-\Delta_{1min}}{\Omega_{1max}-\Omega_{1min}} \quad (3)$$

$$ROM_F = 100 \times \frac{\Delta_{1min}-\Delta_{2max}}{\Omega_{1min}-\Omega_{2max}} \quad (4)$$

More complex parameter P is Variance angle of the head movement during head extension (PE) and flexion (PF). This parameter is reflecting smoothness of the head movement. For further analysis, we selected a middle part (part II) of the movement to avoid transitions between extremes of the cyclic platform movement. Variance of the angle of head movement during the platform movement is obtained from the data samples as follows:

$$P_{\Delta}^2 = \frac{1}{N} \sum_{i=1}^N (\Delta_i - \frac{1}{N} \sum_{i=1}^N \Delta_i)^2 \quad (5)$$

N is the number of measured sample points, i.e. states during half (or I., II. and III. part) of period of head extension or head flexion. There are two factors affecting the number of points: the time of each measurement interval and the sample frequency (it is determined by the recording frequency of the camera), for details see Kutřlek et al., 2015 and Hýbl et al., 2016.

Parameter T describes the time delays in the animal's reaction to the platform movement in the case of head extension (tE) and flexion (tF). This parameter (for the calculation see equations 6 and 7) can reflect habituation and/or anticipation of the cyclic movement by the tested animal. The values of time delay of head movement during extension and flexion are calculated as:

$$t_E = t_{\Delta 1max} - t_{\Omega 1max} \quad (6)$$

$$t_F = t_{\Delta 1min} - t_{\Omega 1min} \quad (7)$$

Unfortunately, it was not possible to finish the experiment and/or evaluate the measured variables in some individuals/species (*Xenopus laevis*, *Pelobates fuscus*, *Hyla cinerea*, *H. arborea*, *Hyperolius mitchelli*, 13 individuals altogether). It was caused by various factors, e.g., removing marks from the body surface through increased mucous glands secretion or constant attempts to burrow in the experimental box.

## Statistical analysis

Species were classified into three broad ecological groups based on the literature. We considered species as terrestrial if they spend most of their time away from water (Table 2). These species cannot be found in the immediate vicinity of water outside the breeding season. We considered as aquatic those species that spend most of their life in water. Finally, we classified as arboreal those frogs that spend most of their life on trees. Moreover, we classified four groups of a locomotion type based on the literature (Zug, 1978; Emerson, 1979,1982; Reilly and Jorgensen, 2011), web resources (AmphibiaWeb) or personal communications with frog keepers. We adopted the categories of hoppers and jumpers based on Emerson's definition (greater than or less than nine body lengths per jump, respectively). Hoppers were divided into two subcategories; walkers/hoppers (WH) and those known to be fossorial and burrow (BWH). Jumpers were categorized as terrestrial (JT) and arboreal (JA). In addition, we classified a tongue-protraction mechanism (mechanical pulling, inertial elongation, and hydrostatic elongation according to Nishikawa, 1999) of each frog species, as it represents other ecological parameter which can be associated with performance.

Since species cannot be considered as independent data points (Felsenstein, 1985), we included the effect of phylogeny in most of the analyses. We adopted a large-scale phylogeny of Amphibia (Pyron and Wiens, 2011) completed with the most recent phylogeny of frogs (Feng et al., 2017). The sample size was defined according to the requirement to cover the huge diversity of frog species/main phylogenetical clades comprising the most basal Archeobatrachia as well as those from modern Neobatrachia. Moreover, the phylogenetical comparative methods are highly sensitive to the phylogenetic sample distribution than to the sample sizes of individuals (Herron and Freeman, 2014). We validated the method on The common toad (*Bufo bufo*, N = 39 individuals). The repeatability of examined parameters was evaluated (see below). We analysed untransformed data using the `gls` function of the 'nlme' package in R (Pinheiro et al., 2017) with the individual and species as nested random factor. The random factor of species was implemented based on the prediction of high

correlation between species-specific and family-specific variations. The aim of the study was to investigate the relationship between head compensatory movements and higher taxonomic levels (family), therefore we treated the effects of the individual and the effect of the species as confounding factors. We employed Akaike Information Criterion to compare a model with and without the species as a random factor (AIC with 3072.655; AIC without 3070.655 for ROM<sub>E</sub>). To avoid the above-mentioned relationship between the family and species taxon level, we employed the model with the species as a random factor, although the AIC was slightly higher. The data followed a normal distribution (according to the Shapiro-Wilk W test). The outliers of ROMs were excluded (ROM > 60 and ROM < -60), because we found that it was the error of measurement due to the movement of the whole body of the frog during the experiment and not the movement of the head itself. We included the family, ecology, locomotion type, body weight, SVL, BMI, rTF, tongue-protraction mechanism and period of platform movement as fixed effects into the models. Repeatability was calculated according to the methods described in Nakagawa and Schielzeth (2010) to assess the proportion of total variance explained by inter-individual differences. The analyses were conducted using the ‘rptR’ package in R, command rptGaussian (Stoffel et al., 2017). This function uses mixed-effects models fitted by the lmer function implemented in the ‘LME4’ package (Bates et al. 2015). We explored the effect of phylogeny under ‘phytools’ package in R (Revell, 2012) using Pagel’s Lambda (Pagel, 1999) and Blomberg’s K (Blomberg et al., 2003) employing the Brownian motion model. As phylogeny had a robust effect on several factors, we conducted the same statistical testing under the ‘ape’ package in R (Paradis et al., 2004) to eliminate the effect of common ancestry. The branch lengths were computed by the method of Grafen (1989) under the ‘ape’ package in R by command ‘compute.brlen’. For visualisation, we employed Mesquite, version 3.31 (Maddison and Maddison, 2017). Basic tests and descriptive statistics were done in Statistica, version 6 (StatSoft Inc., 2001). Calculations of reduced

major axis regression parameters and their confidence intervals (computed by linear and bootstrapping methods) were computed using RMA version 1.14b (Bohonak, 2002).

## Results

We found a high level of repeatability in parameter  $ROM_E$  ( $R = 0.615$ ,  $CI = 0.507 - 0.706$ ,  $P < 0.001$ ) and  $ROM_F$  ( $R = 0.643$ ,  $CI = 0.537 - 0.723$ ,  $P < 0.001$ ); parameters concerning the delay of compensation movement ( $t_E$  and  $t_F$ ) had smaller ( $R = 0.175$  and  $0.166$ , respectively), but still significant repeatability ( $CI = 0.064 - 0.289$ ,  $P < 0.001$  and  $CI = 0.032 - 0.289$ ,  $P < 0.001$ , respectively). Nevertheless, parameters  $P_E$  and  $P_F$  were not repeatable due to the high intra-individual variability, which we further considered in our models.

We found a strong phylogenetic signal in parameter  $ROM_E$  (Pagel's lambda = 0.831,  $p = 0.037$ , Blomberg's  $K = 0.272$ ,  $p = 0.006$ ) and  $ROM_F$  (Pagel's lambda = 0.894,  $p < 0.001$ , Blomberg's  $K = 0.353$ ,  $p = 0.001$ ). Similar results were revealed by the GLM model supporting a strong effect of family (for visualization see Fig. 3) in  $ROM_E$  ( $F_{(9,18)} = 7.489$ ,  $p < 0.001$ ) and  $ROM_F$  ( $F_{(9,19)} = 5.958$ ,  $p < 0.001$ ). We found that families Pyxicephalidae ( $t = 3.404$ ,  $p = 0.003$ ) and Rhacophoridae ( $t = 4.898$ ,  $p < 0.001$ ) exhibited higher, while Dendrobatidae ( $t = -4.006$ ,  $p < 0.001$ ) and Microhylidae ( $t = -3.229$ ,  $p = 0.005$ ) lower values of ROMs (Fig. 4) compared to corresponding overall means ( $t$  and  $P$  values were provided for  $ROM_E$ ). We found no effect of the habitat, locomotion, repetition, tongue-protraction mechanism, BMI, and  $rTF$ .

We found no phylogenetic signal in parameter  $P_E$  (Pagel's lambda  $< 0.001$ ,  $p = 1$ , Blomberg's  $K = 0.154$ ,  $p = 0.216$ ) and  $P_F$  (Pagel's lambda  $< 0.001$ ,  $p = 1$ , Blomberg's  $K = 0.126$ ,  $p = 0.448$ ). The GLM model revealed no effect of the family, habitat, locomotion, repetition and body size.

We found no phylogenetic signal in parameter  $t_E$  (Pagel's lambda  $< 0.001$ ,  $p = 1$ , Blomberg's  $K = 0.102$ ,  $p = 0.787$ ) and  $t_F$  (Pagel's lambda  $< 0.001$ ,  $p = 1$ , Blomberg's  $K = 0.192$ ,  $p = 0.13$ ). GLM model revealed no effect of family, habitat, locomotion, repetition and body size.

Range of movement during flexion ( $ROM_F$ ) corresponded well to that measured during extension ( $ROM_E$ ). This was confirmed by slopes and intercepts of the relationship between these parameters, which are not statistically different from 1 and 0, respectively (slope = 0.992, SE = 0.037, 95%  $CI_{bootstrap}$  = 0.933 - 1.056; intercept = 0.769, SE = 0.037, 95%  $CI_{bootstrap}$  = -1.518 - 1.297).

## Discussion

In this paper, we tested frogs' neuromotor reaction to cyclic movement, which is known as the compensatory movement. Relevant studies (Dieringer and Precht, 1982; Darlington et al., 2002; Straka and Dieringer, 2004) usually apply rather a neurological approach (i.e., the anatomy of vestibular apparatus, unilateral labyrinthectomy, a description of compensatory movements). Nevertheless, a phylogenetic comparative study monitoring the compensatory movements in the ecomorphological context across Anura is completely missing.

We were able to quantify the head compensatory movement ( $ROM_E$  and  $ROM_F$ ), which is known to be the dominant way of frog's gaze stabilization compared to a limited contribution of eyes (Dieringer and Meier, 1994). This parameter was highly repeatable and thus suitable for evaluation of the head compensatory movements in comparative studies. We presumed a close relationship between head compensatory movements and the type of habitat and/or locomotion. A large body of empirical work shows that the habitat and locomotion type is closely linked to morphology and/or performance (Jorgensen and Reilly, 2013; Gomes et al., 2009; Manzano et al., 2017; Moen et al., 2013; Robovská-Havelková et al., 2014; Knight 2018; Hill et al., 2018). However, our results did not support this hypothesis. We found no relationship between the habitat type reflecting the basic ecology of the studied species and their head compensatory movements. Similar results are for the locomotion type contradicting the idea of higher requirements of head compensatory movements according to a more complex 3D habitat and/or locomotion. The absence of a link between ecology and performance

indicates the possible explanation of head compensatory movement as an innate reflex and universal neuromotor reaction (i.e., part of vestibulo-ocular and vestibulo-cervical reflexes).

Nevertheless, we found a strong phylogenetic signal in our data. Some families exhibited a higher range of movement (ROMs) which is linked to greater head compensatory movement. It was most apparent in the group of Natatanura comprising Pyxicephalidae and Rhacophoridae families (but not so apparent in Ranidae). On the other hand, other groups (Dendrobatidae, Microhylidae) exhibited only poor head compensatory movements. We did not find any unique anatomical interpretation distinguishing Natatanura from other frog species explaining the better ability to compensate the cyclic movement of the platform. Several anatomical (diplasiocoelous vertebrae, organization of pectoral and pelvic girdle) and behavioural (tongue-protraction mechanism) characteristics were examined but are shared with other groups of frogs. A previous study on the brain morphology of frogs revealed the relationship between locomotion/ecology and size of the cerebellum and diencephalon (Manzano et al., 2017). Thus, a comparative neuroanatomical survey examining the endorgans and associated innervation of the inner ear responsible for compensatory movements can be promising for rationale of the uncovered pattern.

The higher head compensatory ability can be interpreted as a gyroscopic advantage in foraging and/or antipredator contexts. Visual cues are the dominant sensory modality that most frogs use to detect prey (Lettvin et al., 1959; Kaess and Kaess, 1960; Ewert, 1985; Satou and Shiraishi, 1991). A multidisciplinary neurobiological approach to the neural basis of visually guided prey-catching behavior revealed the concept of the key stimulus and releasing mechanism in toads (Ewert, 1985). Later, studies dealing with the neuromuscular control of prey capture in frogs uncovered a variation in kinematic and behavioral characteristics (liner correction, feedback control, hypoglossal afferents, aiming) in three non-exclusive mechanisms to protract the tongue during foraging (Nishikawa, 1999). Detailed neuroanatomical surveys revealed a link between vision and proprioception (Anderson and Nishikawa, 1993). The head compensatory movement is essential during passive (e.g., drifting in water

flow in aquatic species, hanging on moving twigs in arboreal species) as well as active movements (locomotion, jumping) which are both involved in foraging. Generally, we believe that the gaze stabilization during locomotion can improve or even enable visual perception and catching of the prey. Thus, the uncovered higher ability of gaze stabilization in families Pyxicephalidae and Rhacophoridae may enhance the evolutionary success of these groups belonging to Natatanura. The clade of Natatanura is evolutionary a very successful group of modern frogs belonging to Neobatrachia. It was recently revealed that Neobatrachia with three species-rich clades (Hyoidea, Microhylidae, and Natatanura) that comprise together 88% of extant frogs, simultaneously underwent rapid diversification at the Cretaceous–Paleogene boundary (Feng et al., 2017). Apart from a highly diversified and species-rich group of Hyoidea, the clade of Natatanura is more successful (according to the number of species) than the closely related group of Microhylidae. This is quite intriguing, as species belonging to Microhylidae are exhibiting more plastic and innovative morphology. They express a higher ability to occupy new morpho space (Roelants et al., 2011) due to their plastic morphological responses to the environmental changes (Liem, 1969). These attributes are not common in frogs, as most of frog radiations are not connected with new morphological characteristics. Instead, homoplasy associated with convergent evolution and changes in the number/size of existing structures are frequent in anuran radiations (Bossuyt and Milinkovitch, 2000; Roelants et al., 2011; Moen et al., 2013).

From the distribution of ROMs over the phylogenetic tree, it can be inferred that the anuran ancestor was able to make the head compensatory movements. It was unfortunately not possible to evaluate exactly ROMs of the basal frogs in this study due to the experimental problems. Nevertheless, from the simple view of tilting in frogs, we observed that the most basal species (*Alytes obstetricans*, *Pelobates fuscus*, *Xenopus laevis*) are capable of head compensatory movements. In the following anuran evolution, the decrease as well as increase of these abilities occurred.



Our results also revealed a uniform reaction to the platform movement across the families with respect to the timing and smoothness of the compensatory movements. We did not identify any habituation or anticipation of the platform movement during the experiment. This result is congruent with previous findings of the absence of a brainstem network that stores neural activity related to gaze stability (Dieringer et al., 1983). The speed and smoothness of reaction to the platform movement demonstrated as compensatory movements did not vary across the species and families. However, the lower level of repeatability of these parameters is indicating a large amount of intra-individual variability. It may be related to personality, which is widespread even in cold-blooded vertebrates (Wilson and Krause, 2012; Brodin et al., 2013; Šimková et al., 2018).

In conclusion, we managed to quantify the head compensatory movements in different species of frogs. This is the first study using a platform prototype built for measuring fine movements of small-bodied vertebrates. To our best knowledge, this is the first comparative study focused on the vestibulo-cervical reflex in anurans. Our results did not corroborate the ecomorphological hypothesis anticipating the relationship between ecology/locomotion type and the range of head compensatory movements. Nevertheless, we found a strong phylogenetical signal indicating great compensatory ability movements in families from Natatanura group. Our results indicate a possible link between the higher neuromotor skills and evolutionary success of this group and we interpret it as a possible gyroscopic advantage in the foraging and anti-predatory context. More efforts should be devoted to neuroanatomical characteristics to understand the underlying mechanism.

## Acknowledgements

We thank Ivan Reháček for his great encouragement and enthusiasm for frog biology. We thank Jan Hříbal (D.D.M. Praha) and Jan Rozínek (NaturaServis s.r.o.), who kindly provided frogs for the experiment. We thank Petr Nevrlý for long hours of discussions about mathematical meaning and biological interpretation of the studied parameters describing the compensatory movements of frogs. We are grateful to Silvie Rádlová who kindly illustrated images and Jakub Polák for valuable comments, critical reading of the manuscript and improvement of English. This project was supported by Grant Agency of Czech Republic (Project No. 18-15020S), Grant Agency of Charles University (Project No. 900217), and project SGS15/107/OHK4/1T/17 of the CTU in Prague.

## References

- Anderson, C. W. and Nishikawa, K. C. (1993). A prey-type dependent hypoglossal feedback system in the frog *Rana pipiens*. *Brain, Behav. Evol.* **42(3)**, 189-196.
- Bates, D., Maechler, M., Bolker, B. and Walker, S. (2015). lme4: Linear mixed-effects models using Eigen and S4. R package version 1.1–7. 2014.
- Birn-Jeffery, A. V. and Higham, T. E. (2014). The scaling of uphill and downhill locomotion in legged animals. *Integr. Comp. Biol.* **54(6)**, 1159-72
- Blomberg, S. P., Garland Jr, T. and Ives, A. R. (2003). Testing for phylogenetic signal in comparative data: behavioral traits are more labile. *Evolution* **57(4)**, 717-745.
- Bohonak, A. J. (2002). RMA software for reduced major axis regression. Version 1.14b.
- Bossuyt, F. and Milinkovitch, M. C. (2000). Convergent adaptive radiations in Madagascan and Asian ranid frogs reveal covariation between larval and adult traits. *Proc. Natl. Acad. Sci. U.S.A.* **97(12)**, 6585-6590.

- Brodin, T., Lind, M. I., Wiberg, M. K. and Johansson, F. (2013). Personality trait differences between mainland and island populations in the common frog (*Rana temporaria*). *Behav. Ecol. Sociobiol.* **67**(1), 135-143.
- Darlington, C. L., Dutia, M. B. and Smith, P. F. (2002). The contribution of the intrinsic excitability of vestibular nucleus neurons to recovery from vestibular damage. *Eur. J. Neurosci.* **15**, 1719–1727.
- Dickinson, M. H., Farley, C. T., Full, R. J., Koehl, M. A. R., Kram, R. and Lehman, S. (2000). How animals move: an integrative view. *Science* **288**(5463), 100-106.
- Dieringer, N. and Precht, W. (1982). Compensatory head and eye movements in the frog and their contribution to stabilization of gaze. *Exp. Brain Res.* **47**(3), 394-406.
- Dieringer, N., Cochran, S. L. and Precht, W. (1983). Differences in the central organization of gaze stabilizing reflexes between frog and turtle. *J. Comp. Physiol.* **153**(4), 495-508.
- Dieringer, N. (1987). The role of compensatory eye and head movements for gaze stabilization in the unrestrained frog. *Brain Res.* **404**(1), 33-38.
- Dieringer, N. (1991). Comparative aspects of gaze stabilization in vertebrates. *Zool. Jahrb. Physiol.* **95**, 369-377.
- Dieringer, N. and Meier, R. K. (1994). Strategies for simultaneous image stabilization and gaze orientation in different vertebrates. In: *Information Processing Underlying Gaze Control*, pp. 429-436. Oxford: Pergamon Press.
- Dieringer, N. (1995). ‘Vestibular compensation’: neural plasticity and its relations to functional recovery after labyrinthine lesions in frogs and other vertebrates. *Prog. Neurobiol.* **46**(2), 97-129.
- Emerson, S. B. (1979). The ilio-sacral articulation in frogs: form and function. *Biol. J. Linn. Soc.* **11**(2), 153-168.
- Emerson, S. B. (1982). Frog postcranial morphology: identification of a functional complex. *Copeia* **3**, 603-613.

- Emerson, S. B. (1988). Convergence and morphological constraint in frogs: variation in postcranial morphology. *Fieldiana Zool.* **43**, 1–19.
- Ewert, J. P. (1985). Concepts in vertebrate neuroethology. *Animal Behav.* **33(1)**, 1-29.
- Felsenstein, J. (1985). Phylogenies and the comparative method. *Am. Nat.* **125(1)**, 1-15.
- Feng, Y. J., Blackburn, D. C., Liang, D., Hillis, D. M., Wake, D. B., Cannatella, D. C. and Zhang, P. (2017). Phylogenomics reveals rapid, simultaneous diversification of three major clades of Gondwanan frogs at the Cretaceous–Paleogene boundary. *Proc. Natl. Acad. Sci. U.S.A.* **114(29)**, E5864-E5870.
- Garamszegi, L. Z. (Ed.). (2014). Modern phylogenetic comparative methods and their application in evolutionary biology: concepts and practice. Heildeberg: Springer.
- Garland Jr, T. (1994). Phylogenetic analyses of lizard endurance capacity in relation to body size and body temperature. In: *Lizard ecology: historical and experimental perspectives* (ed. L. J. Vitt and E. R. Pianka), pp. 237-259. Princeton, New Jersey: Princeton University Press.
- Garland, T. and Losos, J. B. (1994). Ecological morphology of locomotor performance in squamate reptiles. In: *Ecological morphology: integrative organismal biology* (ed. P. C. Wainwright and S. M. Reilly), pp. 240-302. Chicago: University of Chicago Press.
- Goldberg, J. E. and Cullen, K. E (2011). Vestibular control of the head: possible functions of the vestibulocollic reflex. *Exp. Brain Res.* **210**, 331–345
- Gomes, F. R., Rezende, E. L., Grizante, M. B. and Navas, C. A. (2009). The evolution of jumping performance in anurans: morphological correlates and ecological implications. *J. Evol. Biol.* **22(5)**, 1088-1097.
- Grafen, A. (1989). The phylogenetic regression. *Phil. Trans. R. Soc. Lond. B* **326(1233)**, 119-157.
- Green, A. J. (2001). Mass/length residuals: measures of body condition or generators of spurious results? *Ecology* **82(5)**, 1473-1483.

- Harvey, P. H. and Pagel, M. D. (1991). *The comparative method in evolutionary biology*. Oxford, UK: Oxford University Press.
- Havelková, P., Herrel, A., Aerts, P. and Roček, Z. (2007). Origin of anuran jumping locomotion: Inference from functional morphology and comparative anatomy. *J. Morphol.* **268**, 1081-1081.
- Herrel, A., Moureaux, C., Laurin, M., Daghfous, G., Crandell, K., Tolley, K. A., Measey, G. J., Vanhooydonck, B. and Boistel, R. (2016). Frog origins: inferences based on ancestral reconstructions of locomotor performance and anatomy. *Fossil Imprint* **72(1-2)**, 108-116.
- Herron, J. C. and Freeman, S. (2014). *Evolutionary Analysis*. London, UK: Pearson Education.
- Hill, I. D., Dong, B., Barnes, W. J. P., Ji, A. and Endlein, T. (2018). The biomechanics of tree frogs climbing curved surfaces: a gripping problem. *J. Exp. Biol.* **221(5)**, jeb168179.
- Hýbl, J., Kutílek, P., Hejda, J., Volf, P., Frynta, D., Landová, E., Frýdlová, P., Křivánek, V. and Černý, R. (2016). Methods for evaluation of kinematic motion data of animal's body on dynamic platform. In *Mechatronics-Mechatronika (ME)*, 2016 17<sup>th</sup> International Conference on. IEEE, 2016.
- Jenkins Jr, F. A. & Shubin, N. H. (1998). *Prosalirus bitis* and the anuran caudopelvic mechanism. *J. Vert. Paleontol.* **18(3)**, 495-510.
- Jorgensen, M. E. and Reilly, S. M. (2013). Phylogenetic patterns of skeletal morphometrics and pelvic traits in relation to locomotor mode in frogs. *J. Evolution. Biol.* **26(5)**, 929-943.
- Kaess, W. and Kaess, F. (1960). Perception of apparent motion in the common toad. *Science* **132(3432)**, 953.
- King, J. R. and Straka, H. (1998). Effects of vestibular nerve lesions on orientation turning in the leopard frog, *Rana pipiens*. *Biol. Bull.* **195(2)**, 193-194.
- Knight, K. (2018). Sticky tree frogs can also get a grip. *J. Exp. Biol.* **221(5)**, jeb177642.
- Kutílek, P., Socha, V., Schlenker, J., Škoda, D., Hýbl, J., Frynta, D., Landová, E., Hášová, T., Černý, R. and Kurali, A. (2015). System for Measuring Movement Response of Small Animals to Changes in

Their Orientation. In Proceeding of International Conference on Applied Electronics, Pilsen, Czech Rep., 8-9 Sept. 2015, pp. 139-144.

Kutílek, P., Škoda, D., Hýbl, J., Černý, R., Frynta, D., Landová, E. and Křivánek, V. (2017). Platform with camera system for measurement of compensatory movements of small animals. *Acta Polytech.* **57(5)**, 321-330.

Liem, S. S. (1969). The morphology, systematics, and evolution of the Old World treefrogs (Rhacophoridae and Hyperoliidae). *PhD* thesis, University of Illinois at Urbana Champaign, Champaign, Illinois.

Lettvin, J. Y., Maturana, H. R., McCulloch, W. S. and Pitts, W. H. (1959). What the frog's eye tells the frog's brain. *Proc. IRE* **47(11)**, 1940-1951.

Losos, J. B. and Miles, D. B. (1994). Adaptation, constraint, and the comparative method: phylogenetic issues and methods. In: *Ecological morphology: integrative organismal biology* (ed. P. C. Wainwright and S. M. Reilly), pp. 60-98. Chicago: The University of Chicago Press.

Maddison, W. P. and Maddison, D. R. (2017). Mesquite: a modular system for evolutionary analysis. Version 3.20.

Manzano, A. S., Herrel, A., Fabre, A. C. and Abdala, V. (2017). Variation in brain anatomy in frogs and its possible bearing on their locomotor ecology. *J. Anat.* **231**, 38 – 58.

Miles, D. B. (1994). Covariation between morphology and locomotory performance in sceloporine lizards. In: *Lizard ecology: historical and experimental perspectives* (ed. L. J. Vitt and E. R. Pianka), pp. 207-235. Princeton, New Jersey: Princeton University Press.

Moen, D. S., Irschick, D. J. and Wiens, J. J. (2013). Evolutionary conservatism and convergence both lead to striking similarity in ecology, morphology and performance across continents in frogs. *Proc. R. Soc. B.* **280** (1773), 20132156.

Motta, P. J. and Kotschal, K. M. (1992). Correlative, experimental, and comparative evolutionary approaches in ecomorphology. *Neth. J. Zool.* **42(2)**, 400-415.

- Nakagawa, S. and Schielzeth, H. (2010). Repeatability for Gaussian and non- Gaussian data: a practical guide for biologists. *Biol. Rev.* **85**(4), 935-956.
- Nishikawa, K. C. (1999). Neuromuscular control of prey capture in frogs. *Phil. Trans. R. Soc. Lond. B* **354**, 941-954.
- Pagel, M. (1999). Inferring the historical patterns of biological evolution. *Nature* **401**(6756), 877-884.
- Paradis, E., Claude, J. and Strimmer, K. (2004). APE: analyses of phylogenetics and evolution in R language. *Bioinformatics* **20**, 289-290.
- Pinheiro, J., Bates, D., DebRoy, S., Sarkar, D. and R Core Team (2017). nlme: Linear and Nonlinear Mixed Effects Models. R package version 3.1-131.
- Přikryl, T., Aerts, P., Havelková, P., Herrel, A. and Roček, Z. (2009). Pelvic and thigh musculature in frogs (Anura) and origin of anuran jumping locomotion. *J. Anat.* **214**(1), 100-139.
- Pyron, R. A. and Wiens, J. J. (2011). A large-scale phylogeny of Amphibia including over 2800 species, and a revised classification of extant frogs, salamanders, and caecilians. *Mol. Phylogenet. Evol.* **61**(2), 543-583.
- Rand, A. S. (1952). Jumping ability of certain anurans, with notes on endurance. *Copeia* **1952**, 15–20.
- Reilly, S. M. and Jorgensen, M. E. (2011). The evolution of jumping in frogs: morphological evidence for the basal anuran locomotor condition and the radiation of locomotor systems in crown group anurans. *J. Morph.* **272**(2), 149-168.
- Reilly, S. M., Montuelle, S. J., Schmidt, A., Naylor, E., Jorgensen, M. E., Halsey, L. G., Essner Jr, R. L. (2015). Conquering the world in leaps and bounds: hopping locomotion in toads is actually bounding. *Funct. Ecol.* **29**(10), 1308-1316.
- Reilly, S. M., Montuelle, S. J., Schmidt, A., Krause, C., Naylor, E., Essner Jr, R. L. (2016). Functional evolution of jumping in frogs: Interspecific differences in take- off and landing. *J. Morph.* **277**(3), 379-393.

- Revell, L. J. (2012) phytools: An R package for phylogenetic comparative biology (and other things). *Methods Ecol. Evol.* **3** (2), 217-223.
- Reynolds, J. S. and Gdowski, G. T. (2008). Head movements produced during whole body rotations and their sensitivity to changes in head inertia in Squirrel Monkeys. *J. Neurophysiol.* **99**(5), 2369–2382.
- Robovská-Havelková, P., Aerts, P., Roček, Z., Přikryl, T., Fabre, A. C. and Herrel, A. (2014). Do all frogs swim alike? The effect of ecological specialization on swimming kinematics in frogs. *J. Exp. Biol.* **217**, 3637 – 3644.
- Roelants, K., Haas, A. and Bossuyt, F. (2011). Anuran radiations and the evolution of tadpole morphospace. *Proc. Natl. Acad. Sci. U.S.A.* **108**(21), 8731-8736.
- Satou, M. and Shiraishi, A. (1991). Local motion processing in the optic tectum of the Japanese toad, *Bufo japonicus*. *J. Comp. Phys. A* **169**(5), 569-589.
- Šimková, O., Frýdlová, P., Žampachová, B., Frynta, D. and Landová, E. (2017). Development of behavioural profile in the Northern common boa (*Boa imperator*): Repeatable independent traits or personality? *PloS One* **12**(5), e0177911.
- Stansfield, B. W., Hillman, S. J., Hazlewood, M. E. and Robb, J. E. (2006). Regression analysis of gait parameters with speed in normal children walking at self-selected speeds. *Gait posture* **23**(3), 288-294.
- StatSoft Inc (2001) STATISTICA, version 6.0.
- Stoffel, M. A., Nakagawa, S. and Schielzeth, H. (2017). rptR: repeatability estimation and variance decomposition by generalized linear mixed- effects models. *Methods Ecol. Evol.* **8**(11), 1639-1644.
- Takemura, K. and King, W. M. (2005). Vestibulo-collic reflex (VCR) in mice. *Exp. Brain Res.* **167**(1), 103–107.
- Straka, H. and Dieringer, N. (2004). Basic organization principles of the VOR: lessons from frogs. *Prog. Neurobiol.* **73**(4), 259-309.



- Tempia, F., Dieringer, N. and Strata, P. (1991). Adaptation and habituation of the vestibulo-ocular reflex in intact and inferior olive-lesioned rats. *Exp. Brain Res.* **86(3)**, 568-578.
- Uchino, Y. and Kushiro, K. (2011). Differences between otolith and semicircular canal activated neural circuitry in the vestibular system. *Neurosci. Res.* **71(4)**, 315–327.
- Wilson, A. D. and Krause, J. (2012). Personality and metamorphosis: is behavioral variation consistent across ontogenetic niche shifts? *Behav. Ecol.* **23(6)**, 1316-1323.
- Zug, G. R. (1972). Anuran locomotion: structure and function. I. Preliminary observations on relation between jumping and osteometrics of appendicular and postaxial skeleton. *Copeia* **4**, 613–624.
- Zug, G. R. (1978). Anuran locomotion: structure and function, 2: jumping performance of semiaquatic, terrestrial, and arboreal frogs. *Smithson Contrib. Zool.* **276**, 1–31.
- Zug, G. R., Vitt, L. J. and Caldwell, J. P. (2001). *Herpetology: An Introductory Biology of Amphibians and Reptiles*. Cambridge, Massachusetts: Academic Press.

**Table 1.** Summary of the proposed parameters determined using methods of evaluation of time domain data for quantitative evaluation of angular movement response of animals to changes in their body orientation on rotating platform.

| <b>Parameter</b>                                                                                                                       | <b>Abbreviation</b> | <b>Unit</b>    |
|----------------------------------------------------------------------------------------------------------------------------------------|---------------------|----------------|
| Normalized range of head angular movement relative to the platform during the extension                                                | ROM <sub>E</sub>    | %              |
| Normalized range of head angular movement relative to the platform during the flexion                                                  | ROM <sub>F</sub>    | %              |
| The time delay between the achieved maximum angle of head movement and maximum angle of platform movement                              | t <sub>E</sub>      | s              |
| The time delay between the achieved minimum angle of head movement and minimum angle of platform movement                              | t <sub>F</sub>      | s              |
| Variance of the angle of head movement during the platform movement and extension until reaching the maximum angle of head movement    | P <sub>E</sub>      | % <sup>2</sup> |
| Variance of the angle of head movement during the platform movement and head flexion until reaching the minimum angle of head movement | P <sub>F</sub>      | % <sup>2</sup> |

**Table 2. The table of experimental animals and ecological parameters.** The table of experimental animals, family membership, number of studied frog species and ecological factors depicting the habitat use, typical mode of movement and the mechanism of tongue-protraction.

| Species                                                    | Family         | N  | Life code   | Movement            | Tongue-protraction mechanism |
|------------------------------------------------------------|----------------|----|-------------|---------------------|------------------------------|
| <i>Bombina bombina</i> (Linnaeus, 1761)                    | Bombinatoridae | 2  | aquatic     | walkers/hoppers     | mechanical pulling           |
| <i>Bombina variegata</i> (Linnaeus, 1758)                  | Bombinatoridae | 3  | aquatic     | walkers/hoppers     | mechanical pulling           |
| <i>Bufo bufo</i> (Linnaeus, 1758)                          | Bufo           | 39 | terrestrial | walkers/hoppers     | inertial elongation          |
| <i>Bufo viridis</i> (Laurenti, 1768)                       | Bufo           | 2  | terrestrial | walkers/hoppers     | inertial elongation          |
| <i>Dendrobates leucomelas</i> (Steindachner, 1864)         | Dendrobatidae  | 2  | terrestrial | walkers/hoppers     | inertial elongation          |
| <i>Dendrobates tinctorius</i> (Cuvier, 1797)               | Dendrobatidae  | 2  | terrestrial | jumping terrestrial | inertial elongation          |
| <i>Dendropsophus microps</i> (Peters, 1872)                | Hylidae        | 2  | arboreal    | walkers/hoppers     | mechanical pulling           |
| <i>Duttaphrynus melanostictus</i> (Schneider, 1799)        | Bufo           | 2  | terrestrial | walkers/hoppers     | inertial elongation          |
| <i>Dyscophus guineti</i> (Grandidier, 1875)                | Microhylidae   | 2  | terrestrial | burrowing           | hydrostatic elongation       |
| <i>Epidalea calamita</i> (Laurenti, 1768)                  | Bufo           | 1  | terrestrial | burrowing           | inertial elongation          |
| <i>Epipedobates anthonyi</i> (Noble, 1921)                 | Dendrobatidae  | 2  | terrestrial | jumping terrestrial | inertial elongation          |
| <i>Hylarana erythraea</i> (Schlegel, 1837)                 | Ranidae        | 2  | terrestrial | jumping terrestrial | inertial elongation          |
| <i>Kaloula pulchra</i> (Gray, 1831)                        | Microhylidae   | 2  | terrestrial | burrowing           | hydrostatic elongation       |
| <i>Leptopelis vermiculatus</i> (Boulenger, 1909)           | Arthroleptidae | 2  | arboreal    | jumping arboreal    | inertial elongation          |
| <i>Osteopilus septentrionalis</i> (Duméril & Bibron, 1841) | Hylidae        | 3  | arboreal    | jumping arboreal    | mechanical pulling           |
| <i>Pelophylax esculentus</i> (Linnaeus, 1758)              | Ranidae        | 1  | aquatic     | jumping terrestrial | inertial elongation          |
| <i>Phlyctimantis maculatus</i> (Duméril, 1853)             | Hyperoliidae   | 2  | arboreal    | jumping arboreal    | inertial elongation          |
| <i>Phrynomantis bifasciatus</i> (Smith, 1847)              | Microhylidae   | 2  | terrestrial | walkers/hoppers     | hydrostatic elongation       |
| <i>Phyllobates terribilis</i> (Myers, Daly & Malkin, 1978) | Dendrobatidae  | 2  | terrestrial | jumping terrestrial | inertial elongation          |
| <i>Phyllobates vittatus</i> (Cope, 1893)                   | Dendrobatidae  | 2  | terrestrial | jumping terrestrial | inertial elongation          |
| <i>Polypedates leucomystax</i> (Gravenhorst, 1829)         | Rhacophoridae  | 3  | arboreal    | jumping arboreal    | inertial elongation          |
| <i>Pyxicephalus edulis</i> (Peters, 1854)                  | Pyxicephalidae | 2  | terrestrial | jumping terrestrial | inertial elongation          |
| <i>Rana dalmatina</i> (Fitzinger, 1839)                    | Ranidae        | 4  | terrestrial | jumping terrestrial | inertial elongation          |
| <i>Rana temporaria</i> (Linnaeus, 1758)                    | Ranidae        | 3  | terrestrial | jumping terrestrial | inertial elongation          |
| <i>Rentapia hosii</i> (Boulenger, 1892)                    | Bufo           | 1  | arboreal    | jumping arboreal    | inertial elongation          |
| <i>Sclerophrys regularis</i> (Reuss, 1833)                 | Bufo           | 4  | terrestrial | walkers/hoppers     | inertial elongation          |
| <i>Rhinella marina</i> (Linnaeus, 1758)                    | Bufo           | 2  | terrestrial | jumping terrestrial | inertial elongation          |
| <i>Theloderma corticale</i> (Boulenger, 1903)              | Rhacophoridae  | 2  | terrestrial | jumping arboreal    | inertial elongation          |
| <i>Trachycephalus resinifictrix</i> (Goeldi, 1907)         | Hylidae        | 2  | arboreal    | jumping arboreal    | mechanical pulling           |

## Figures

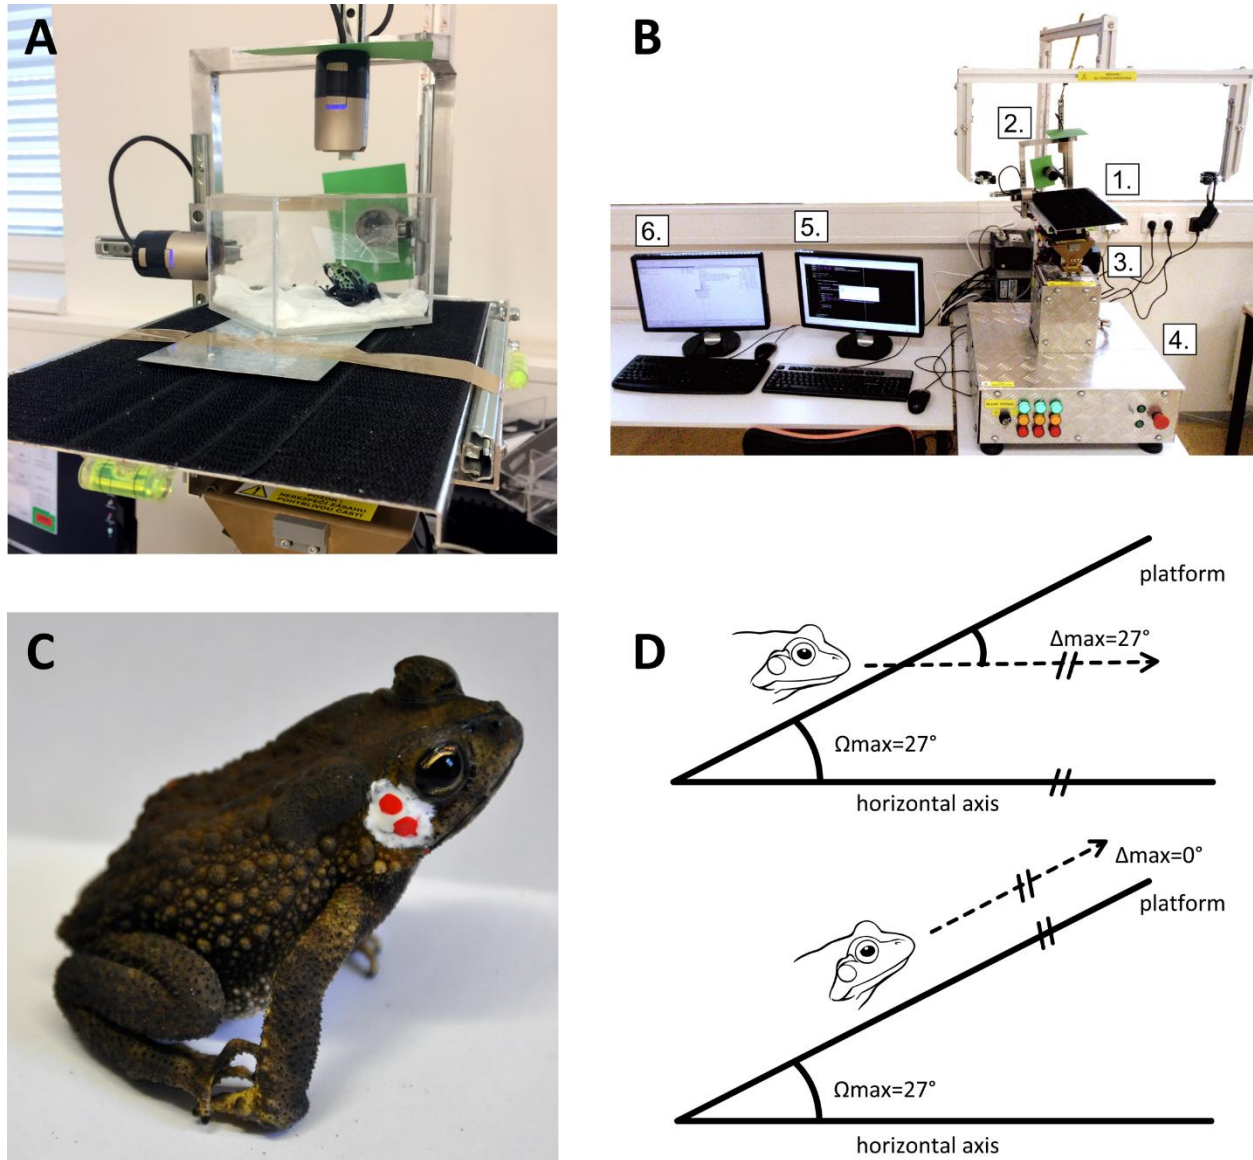

**Figure 1. Experimental design scheme.** The detail of frog in experimental box (A), the laboratory system measuring animal body response on a dynamic platform (B), the detail of frog's head with

markers on the temporal side (C), a schematic drawing describing the measurements of the platform and head angles in extreme cases (D). (B) 1. Moving platform, 2. Camera subsystem, 3. Actuator unit, 4. Control and data collection unit, 5. PC instructing platform movement, 6. PC for data processing and movement angles determination. (D) The case of perfect head compensatory movements (the maximal tilt angle of the head  $\Delta_{\max}$  is the same as the maximal angle of the dynamic platform  $\Omega_{\max}$ ) above and the case of the absence of head compensatory movements (the maximal tilt angle of the head  $\Delta_{\max}$  is zero) below.

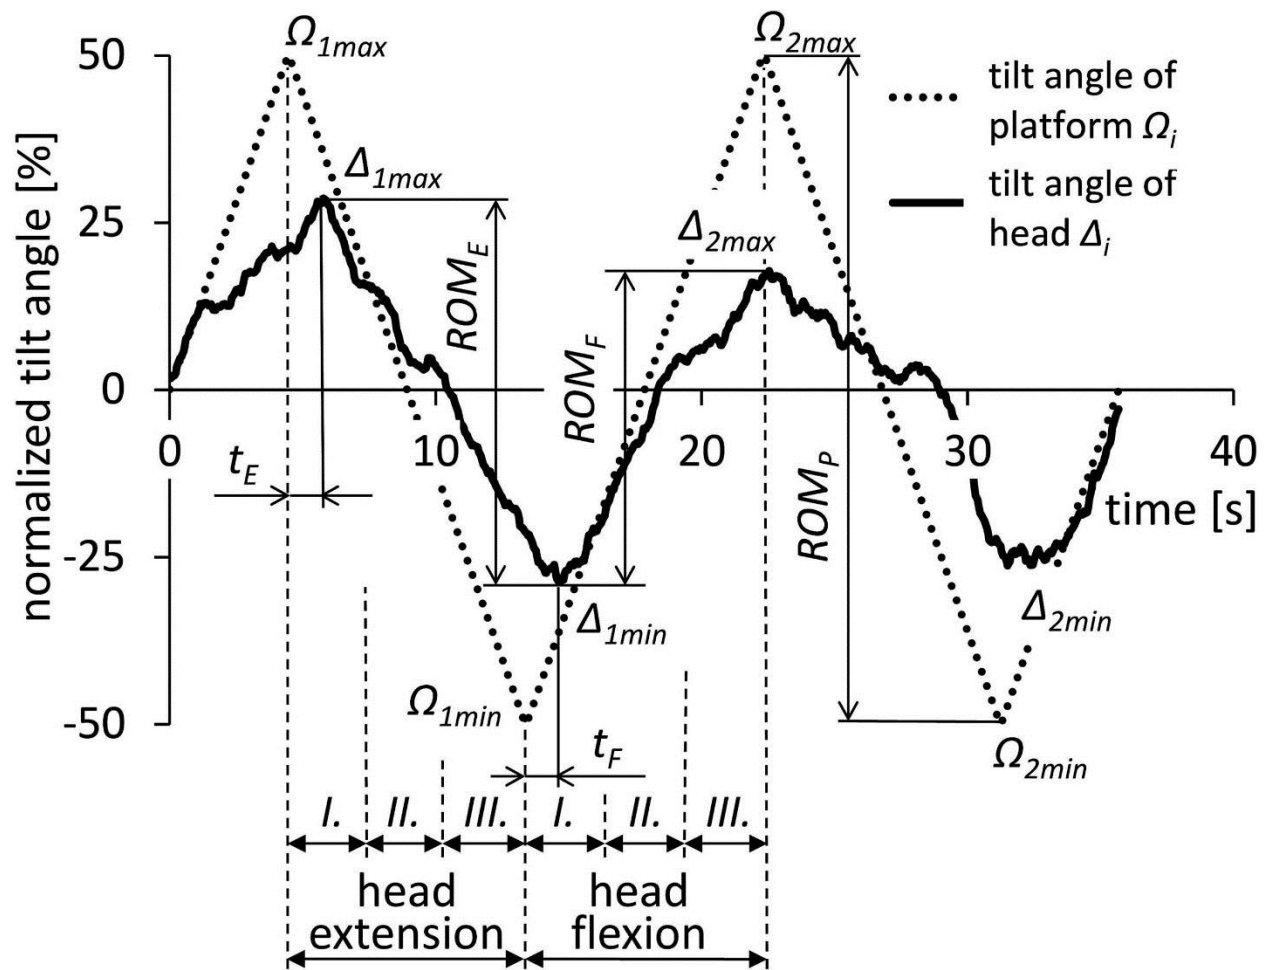

**Figure 2. The diagram of head and platform movement.** Example of data recorded during the platform movement and animal head movement in sagittal plane. Abbreviation:  $\Omega_{\max}$  and  $\Omega_{\min}$  is the maximal and minimal tilt angle of the dynamic platform;  $\Delta_{\max}$  and  $\Delta_{\min}$  is the maximal and minimal tilt angle of the head; ROMs describes the range of movement during the movement of the platform up ( $ROM_E$ ; head extension) and down ( $ROM_F$ ; head flexion);  $ROM_P$  is the range of movement of the platform ( $ROM_P=2 \cdot \Omega_{\max}$ ;  $t$  is the time delays in the animal's reaction to the movement of the platform up ( $t_E$ ) and down ( $t_F$ ).

A

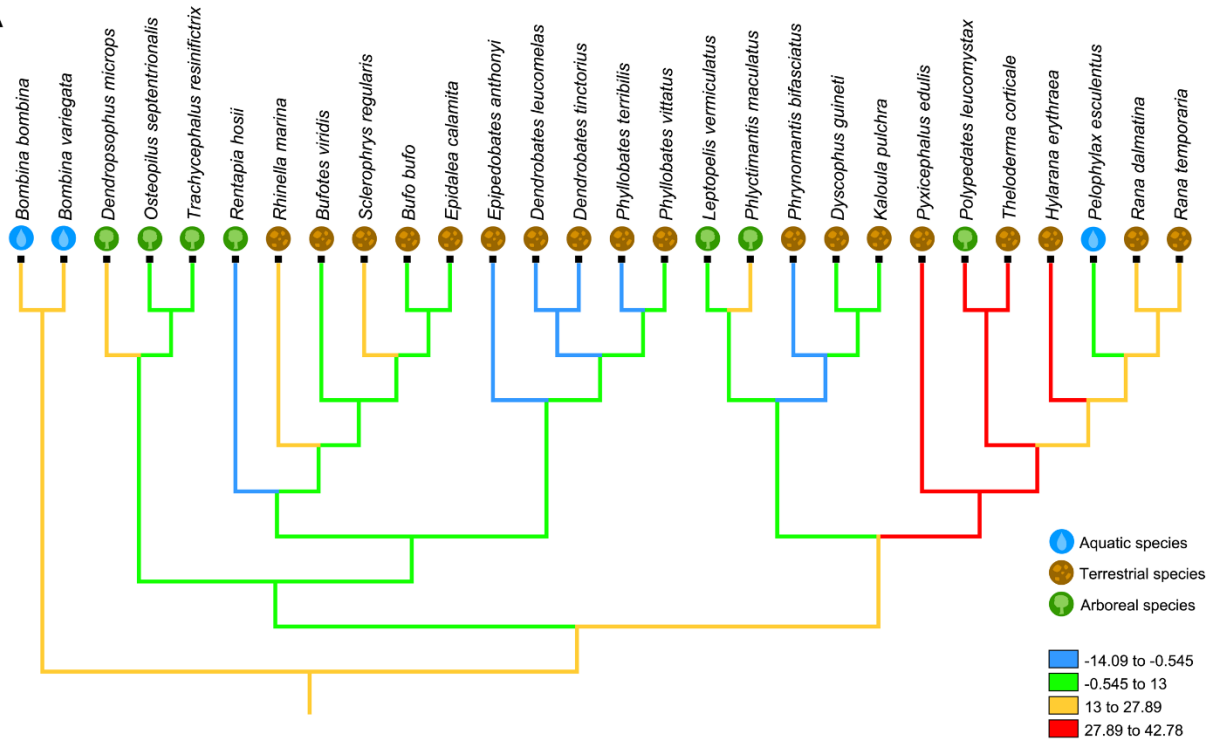

B

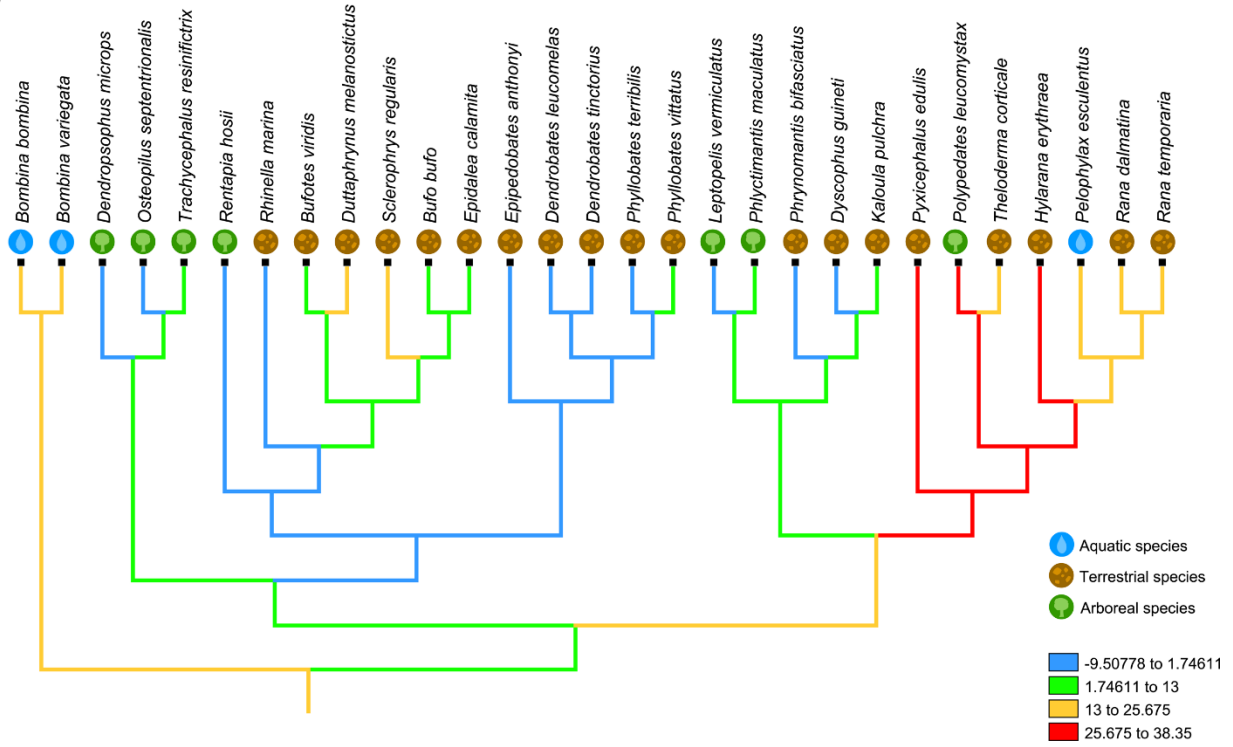

**Figure 3. The visualisation of the range of movement of the tested frogs on phylogenetic tree.**

(A) The head extension during the movement of the platform up ( $ROM_E$ ). (B) The head flexion during the movement of the platform down ( $ROM_F$ ). The colour of lines indicates median values of  $ROM_E$  and  $ROM_F$  for species in categories increasing from the lowest values of blue, through green and yellow to the highest values of red. The ecology of studied species is depicted. For the number of studied species see Table 2. Reconstruction of ancestral states by parsimony method implemented in Mesquite (Maddison and Maddison, 2017) is provided for illustration only.



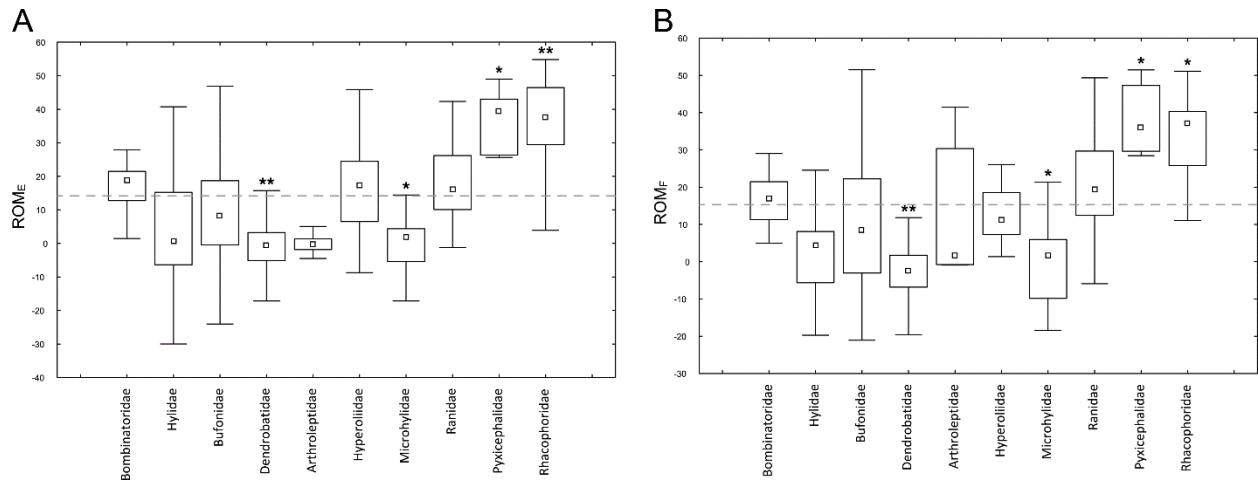

**Figure 4. Box plots of ROMs categorized for the family.** Original untransformed values of the range of movement during (A) head extension (ROM<sub>E</sub>) and (B) head flexion (ROM<sub>F</sub>) visualised in a form of box plots in categories of consecutive families. Medians, 25 and 75 percentiles, minimal/maximal non-outlier values and significance (ANOVA p-values: \* p < 0.01; \*\* p < 0.001) results of ROMs compared to corresponding overall means (dotted grey line) are depicted. For the summary of studied species in each family see Table 2.
